# Supplementary material
Source: PubMed Central journal article supplement (PMC7247794)
Supplement: mmc1.pdf [file mmc1.pdf]

# THE LANCET

## Haematology

### Supplementary appendix

This appendix formed part of the original submission and has been peer reviewed. We post it as supplied by the authors.

Supplement to: Chen W, Yang B, Li Z, Wang P, Chen Y, Zhou H. Sudden severe thrombocytopenia in a patient in the recovery stage of COVID-19. *Lancet Haematol* 2020; published online May 25. [https://doi.org/10.1016/S2352-3026\(20\)30175-7](https://doi.org/10.1016/S2352-3026(20)30175-7).

Day 13

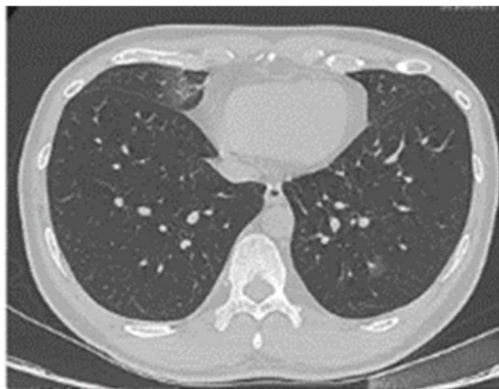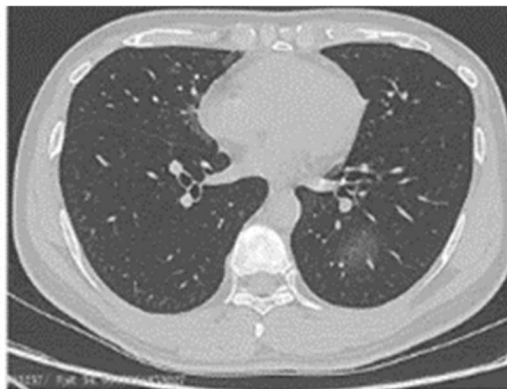

Day 23

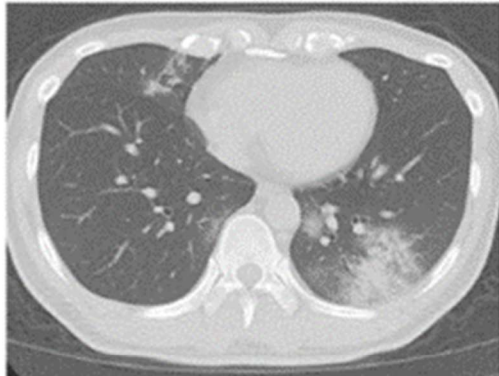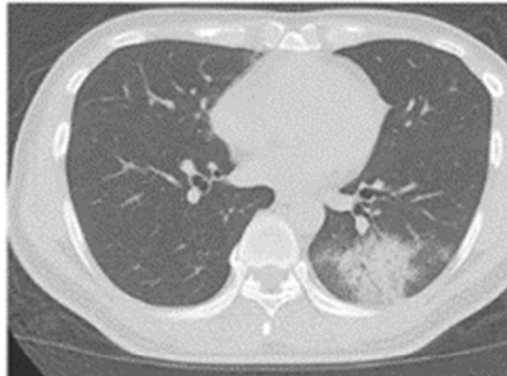

Day 29

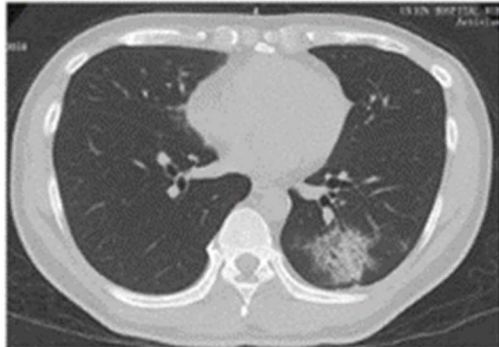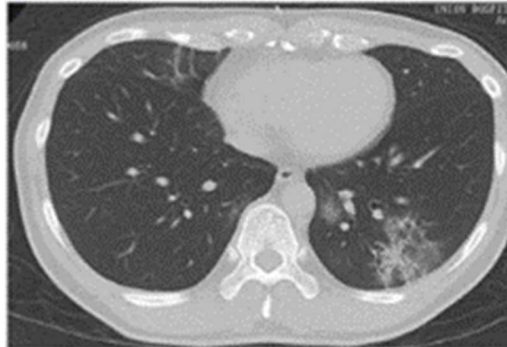

Day 42

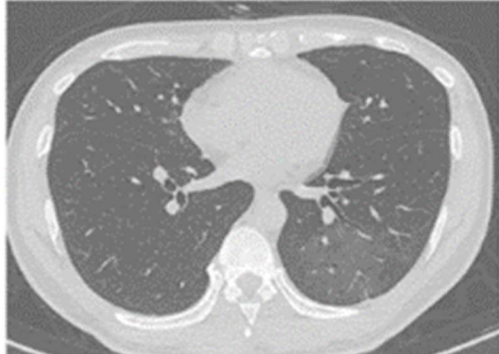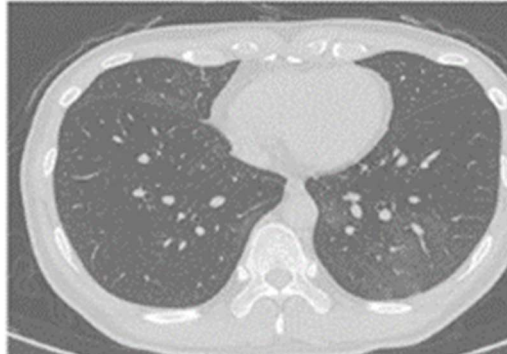

**Table 1. The laboratory results at admission and platelet nadir time.**

| <b>Date</b>                                 |                   | <b>2-11</b> | <b>2-20</b> |
|---------------------------------------------|-------------------|-------------|-------------|
| Day after onset                             |                   | Day 20      | Day 29      |
| Leukocytic count (cells×10 <sup>9</sup> /L) | [Ref] 3.50-9.50   | 4.74        | 3.93        |
| Hemoglobin (g/L)                            | [Ref] 130-175     | 144         | 145         |
| Platelet count (cells×10 <sup>9</sup> /L)   | [Ref] 125 -350    | 190         | 2           |
| Neutrophils (cells×10 <sup>9</sup> /L)      | [Ref] 1.80-6.30   | 2.55        | 2.19        |
| Lymphocyte count (cells×10 <sup>9</sup> /L) | [Ref] 1.10-3.20   | 1.67        | 1.40        |
| D-dimer (mg/L FE)                           | [Ref] < 0.50      | 0.22        | 0.22        |
| Fibrinogen (g/L)                            | [Ref] 2.00-4.00   | 5.37        | 4.40        |
| PT (s)                                      | [Ref] 11.00-16.00 | 12.90       | 13.70       |
| APTT (s)                                    | [Ref] 28.00-43.50 | 40.30       | 38.70       |

**Table 2. The dynamics of lymphocyte subsets.**

| <b>Date</b>                          |                   | <b>2-12</b> | <b>2-20</b> | <b>3-7</b> |
|--------------------------------------|-------------------|-------------|-------------|------------|
| Day after onset                      |                   | Day 21      | Day 29      | Day 45     |
| CD3 <sup>+</sup> T lymphocytes (%)   | [Ref] 58.17-84.22 | 72.72       | 55.39       | 73.54      |
| CD4 <sup>+</sup> T lymphocytes (%)   | [Ref] 25.34-51.37 | 46.03       | 31.99       | 52.81      |
| CD8 <sup>+</sup> T lymphocytes (%)   | [Ref] 14.23-38.95 | 21.12       | 17.94       | 19.85      |
| CD19 <sup>+</sup> B lymphocytes (%)  | [Ref] 4.10-18.31  | 18.62       | 34.80       | 16.47      |
| CD56 <sup>+</sup> NK lymphocytes (%) | [Ref] 3.33-30.47  | 6.42        | 6.31        | 6.36       |

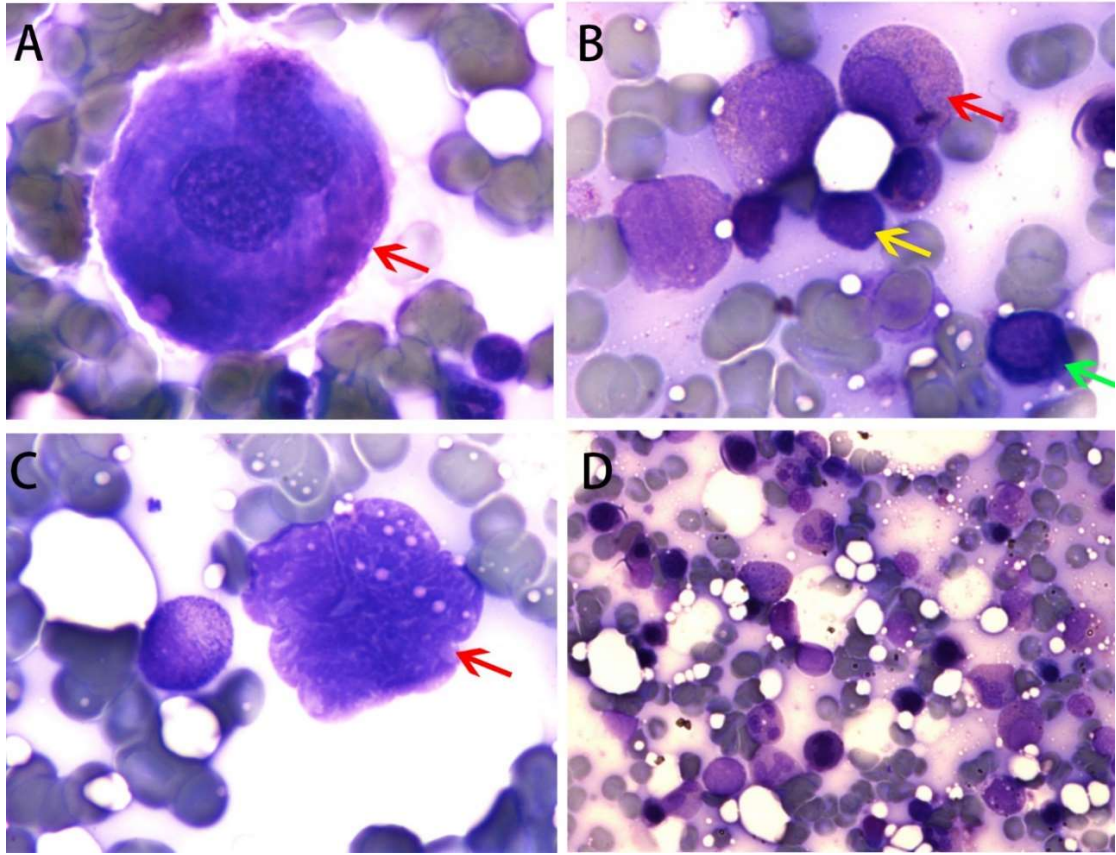

A. red arrow: granular megakaryocyte (x1000); B. red arrow: metamyelocyte, yellow arrow: mature lymphocyte, green arrow: rubricyte (x1000); C. red arrow: nude-nuclear megakaryocyte (x1000); D. examine under low magnification (x400).

## References

- [1] Yang, M., M.H. Ng, and C.K. Li, *Thrombocytopenia in patients with severe acute respiratory syndrome (review)*. *Hematology*, 2005. 10(2): p. 101-5.
- [2] Magdi, M. and A. Rahil, *Severe Immune Thrombocytopenia Complicated by Intracerebral Haemorrhage Associated with Coronavirus Infection: A Case Report and Literature Review*. *European journal of case reports in internal medicine*, 2019. 6(7): p. 001155-001155.
- [3] Lee, C.Y., et al., *Acute immune thrombocytopenic purpura in an adolescent with 2009 novel H1N1 influenza A virus infection*. *J Chin Med Assoc*, 2011. 74(9): p. 425-7.
- [4] Kaneko, H., et al., *Relapse of idiopathic thrombocytopenic purpura caused by influenza A virus infection: a case report*. *J Infect Chemother*, 2004. 10(6): p. 364-6.
- [5] Joob, B. and V. Wiwanitkit, *Thrombocytopenia: An important presentation of new emerging H7N9 influenza*. *Platelets*, 2014. 25(4): p. 308.
- [6] Karimi, O., et al., *Thrombocytopenia and subcutaneous bleedings in a patient with Zika virus infection*. *Lancet*, 2016. 387(10022): p. 939-940.
- [7] Sharp, T.M., et al., *Zika Virus Infection Associated with Severe Thrombocytopenia*. *Clin Infect Dis*, 2016. 63(9): p. 1198-1201.
